# Supplementary material for: Effectiveness of Bacillus subtilis ANT01 and Rhizobium sp. 11B on the control of fusarium wilt in pineapple (Ananas comosus)
Source: PeerJ. 2024 Mar 4;12:e16871. doi: 10.7717/peerj.16871 (PMC10921932; doi:10.7717/peerj.16871)
Supplement: Supplemental Information 1 [file peerj-12-16871-s001.xlsx]

## Sheet: Hoja1
	COLONY-FORMING UNITS PER GRAM OF SOIL (10^4)
							DAIT
	treatment	0	28	56	84	112	140	168	196	224	252	280
	T1 / Control	3	2.5	5	2.5	1.7	1.3	1.7	2.3	2	2	1.7
	T2 / Bacillus subtilis ANT01	2.5	3.5	4	2.5	2	1.7	1.3	1	1.3	1.3	1
	T3/ Rhizobium sp. 11B	2	1.5	2.5	3	2.7	2.3	2	2	2.7	1.7	1.7
	T4/ strains ANT01+11B	2	1.5	5.5	3	2.7	2.3	2	1.3	1.7	1.3	1.3
	>
	TIME-COURSE EVOLUTION OF FUSARIUM WILT SEVERITY
		DAIT
	treatment	0	14	28	42	56	70	84	98	112	126	140	154	168	182	196	210	224	238	252	266	280
	T1 / Control	0.34	0.4	0.33	0.34	0.46	0.34	0.12	0.15	0.15	0.17	0.12	0.1	0.08	0.13	0.13	0.08	0.17	0.2	0.23	0.16	0.19
	T2 / Bacillus subtilis ANT01	0.4	0.4	0.32	0.5	0.45	0.36	0.27	0.26	0.16	0.13	0.1	0.07	0.05	0.05	0.05	0.02	0.03	0.02	0.04	0.05	0.03
	T3/ Rhizobium sp. 11B	0.37	0.44	0.45	0.55	0.54	0.49	0.24	0.22	0.26	0.25	0.25	0.21	0.25	0.15	0.21	0.09	0.23	0.27	0.24	0.19	0.21
	T4/ strains ANT01+11B	0.33	0.34	0.6	0.63	0.62	0.36	0.26	0.28	0.15	0.09	0.11	0.09	0.09	0.06	0.08	0.05	0.08	0.13	0.15	0.12	0.17
